# Supplementary material
Source: ML conference proceedings conference paper supplement (https://openaccess.thecvf.com/content/ICCV2023/html/Ye_Neural_Deformable_Models_ICCV_2023_paper.html)
Supplement: Supplementary file 1 [file Ye_Neural_Deformable_Models_ICCV_2023_supplemental.pdf]

# Supplementary Materials for Neural Deformable Models

Meng Ye<sup>1</sup>, Dong Yang<sup>2</sup>, Mikael Kanski<sup>3</sup>, Leon Axel<sup>3</sup>, Dimitris Metaxas<sup>1</sup>  
<sup>1</sup>Rutgers University, <sup>2</sup>NVIDIA, <sup>3</sup>New York University School of Medicine  
{my389, dnm}@cs.rutgers.edu

## 1. Detailed Quantitative Results of Bi-ventricular Shape Reconstruction

In Table 1, we show the detailed Chamfer distance (CD), earth mover’s distance (EMD) and point-to-surface distance (P2F) for geometric similarity evaluation of LV-endo, LV-epi and RV shape reconstructions. Our method outperforms all the baseline methods for LV-endo, LV-epi and RV shape reconstruction, respectively.

In Table 2, we show the detailed normal consistency (NC), easy non-manifold face (ENF) ratio and self-intersection (SI) ratio for reconstructed mesh quality evaluation of LV-endo, LV-epi and RV shapes. On average, our method can generate better cardiac meshes than all the baseline methods.

## 2. Detailed Quantitative Results of Bi-ventricular Shape Registration

In Table 3, we show the detailed CD, EMD, P2F for LV-endo, LV-epi and RV shape registration accuracy evaluations. Note that we register shapes from ED phase to ES phase. Our method outperforms all the baseline methods for LV-endo, LV-epi and RV shape registration, respectively.

| Phase | Method  | CD (mm) ↓           |                     |                     |                     | EMD (mm) ↓          |                    |                    |                     | P2F (mm) ↓           |                      |                      |                      |
|-------|---------|---------------------|---------------------|---------------------|---------------------|---------------------|--------------------|--------------------|---------------------|----------------------|----------------------|----------------------|----------------------|
|       |         | Endo                | Epi                 | RV                  | avg                 | Endo                | Epi                | RV                 | avg                 | Endo                 | Epi                  | RV                   | avg                  |
| ED    | MR-Net  | 2.56 ± 1.14         | 3.32 ± 1.10         | 3.39 ± 1.07         | 3.09 ± 1.06         | 6.04 ± 1.19         | 6.67 ± 1.71        | 5.44 ± 1.67        | 6.05 ± 1.17         | 1.26 ± 0.984         | 1.32 ± 0.817         | 1.82 ± 0.945         | 1.47 ± 0.877         |
|       | NMF     | 5.85 ± 4.43         | 5.67 ± 4.33         | 7.40 ± 8.96         | 6.31 ± 5.54         | 6.16 ± 1.37         | 6.61 ± 1.68        | 6.73 ± 2.27        | 6.50 ± 1.43         | 4.07 ± 3.70          | 3.45 ± 3.88          | 5.69 ± 8.03          | 4.40 ± 4.90          |
|       | Ours-un | 2.72 ± 0.915        | 4.38 ± 0.978        | 8.38 ± 4.46         | 5.16 ± 1.70         | 5.93 ± 1.31         | 6.42 ± 1.60        | 6.24 ± 1.99        | 6.20 ± 1.26         | 1.37 ± 0.704         | 2.15 ± 0.682         | 5.81 ± 3.56          | 3.11 ± 1.30          |
|       | Ours    | <b>2.25 ± 1.03</b>  | <b>2.91 ± 0.762</b> | <b>3.02 ± 0.892</b> | <b>2.73 ± 0.795</b> | <b>5.70 ± 1.14</b>  | <b>6.38 ± 1.72</b> | <b>5.33 ± 1.69</b> | <b>5.80 ± 1.17</b>  | <b>1.01 ± 0.850</b>  | <b>1.06 ± 0.515</b>  | <b>1.43 ± 0.712</b>  | <b>1.17 ± 0.606</b>  |
| ES    | MR-Net  | 2.11 ± 0.898        | 2.73 ± 0.755        | 2.28 ± 0.805        | 2.37 ± 0.729        | 2.59 ± 0.524        | 5.27 ± 1.53        | 5.64 ± 1.63        | 4.50 ± 0.666        | 1.18 ± 0.801         | 1.16 ± 0.539         | 1.35 ± 0.767         | 1.23 ± 0.641         |
|       | NMF     | 3.41 ± 3.10         | 3.74 ± 1.47         | 4.05 ± 2.83         | 3.74 ± 2.26         | 2.76 ± 0.870        | 5.29 ± 1.38        | 6.17 ± 1.72        | 4.74 ± 0.796        | 2.25 ± 2.35          | 2.04 ± 1.13          | 3.11 ± 2.59          | 2.46 ± 1.86          |
|       | Ours-un | 1.97 ± 0.631        | 3.44 ± 0.663        | 3.27 ± 1.55         | 2.90 ± 0.732        | 2.93 ± 0.633        | 5.14 ± 1.27        | 5.37 ± 1.56        | 4.48 ± 0.656        | 1.15 ± 0.483         | 1.77 ± 0.433         | 1.95 ± 1.13          | 1.63 ± 0.516         |
|       | Ours    | <b>1.50 ± 0.542</b> | <b>2.32 ± 0.582</b> | <b>1.92 ± 0.823</b> | <b>1.91 ± 0.556</b> | <b>2.23 ± 0.481</b> | <b>4.92 ± 1.42</b> | <b>5.06 ± 1.49</b> | <b>4.07 ± 0.607</b> | <b>0.759 ± 0.397</b> | <b>0.914 ± 0.356</b> | <b>0.947 ± 0.605</b> | <b>0.873 ± 0.392</b> |

Table 1. Detailed Chamfer distance (CD), earth mover’s distance (EMD) and point-to-surface distance (P2F) for geometric similarity evaluation of LV-endo, LV-epi and RV shape reconstruction, respectively.

| Phase | Method  | NC ↑                 |                      |                      |                      | ENF ↓               |                 |                     |                     | SI ↓          |               |               |               |
|-------|---------|----------------------|----------------------|----------------------|----------------------|---------------------|-----------------|---------------------|---------------------|---------------|---------------|---------------|---------------|
|       |         | Endo                 | Epi                  | RV                   | avg                  | Endo                | Epi             | RV                  | avg                 | Endo          | Epi           | RV            | avg           |
| ED    | MR-Net  | 0.713 ± 0.034        | 0.707 ± 0.033        | 0.866 ± 0.012        | 0.762 ± 0.024        | 1.48 ± 0.004        | 1.48 ± 0.002    | 1.47 ± 0.004        | 1.48 ± 0.003        | 0.035 ± 0.024 | 0.016 ± 0.012 | 0.055 ± 0.018 | 0.035 ± 0.013 |
|       | NMF     | 0.715 ± 0.031        | 0.707 ± 0.033        | 0.854 ± 0.024        | 0.759 ± 0.024        | 1.47 ± 0            | 1.47 ± 0        | 1.44 ± 0            | 1.46 ± 0            | 0.011 ± 0.027 | 0.016 ± 0.026 | 0.030 ± 0.046 | 0.019 ± 0.020 |
|       | Ours-un | <b>0.717 ± 0.033</b> | 0.701 ± 0.032        | 0.835 ± 0.016        | 0.751 ± 0.022        | 1.47 ± 0            | 1.47 ± 0.002    | <b>1.42 ± 0.004</b> | <b>1.45 ± 0.002</b> | 0 ± 0         | 0 ± 0.001     | 0.007 ± 0.011 | 0.002 ± 0.004 |
|       | Ours    | 0.716 ± 0.032        | <b>0.709 ± 0.034</b> | <b>0.871 ± 0.011</b> | <b>0.765 ± 0.023</b> | <b>1.47 ± 0</b>     | <b>1.47 ± 0</b> | 1.44 ± 0            | 1.46 ± 0            | 0 ± 0         | 0 ± 0.001     | 0 ± 0         | 0 ± 0         |
| ES    | MR-Net  | 0.708 ± 0.028        | 0.698 ± 0.033        | 0.843 ± 0.017        | 0.750 ± 0.022        | <b>1.46 ± 0.010</b> | 1.49 ± 0.003    | 1.46 ± 0.006        | 1.47 ± 0.005        | 0.113 ± 0.042 | 0.012 ± 0.014 | 0.078 ± 0.024 | 0.068 ± 0.018 |
|       | NMF     | 0.716 ± 0.030        | 0.699 ± 0.034        | 0.840 ± 0.021        | 0.752 ± 0.023        | 1.47 ± 0            | 1.47 ± 0        | 1.44 ± 0            | 1.46 ± 0            | 0.012 ± 0.025 | 0.018 ± 0.025 | 0.051 ± 0.082 | 0.027 ± 0.030 |
|       | Ours-un | <b>0.719 ± 0.031</b> | 0.693 ± 0.033        | 0.830 ± 0.015        | 0.747 ± 0.022        | 1.47 ± 0            | 1.47 ± 0.001    | <b>1.43 ± 0.004</b> | <b>1.45 ± 0.001</b> | 0 ± 0         | 0 ± 0         | 0.004 ± 0.006 | 0.002 ± 0.002 |
|       | Ours    | 0.715 ± 0.032        | <b>0.701 ± 0.033</b> | <b>0.857 ± 0.013</b> | <b>0.758 ± 0.022</b> | 1.47 ± 0            | <b>1.47 ± 0</b> | 1.44 ± 0            | 1.46 ± 0            | 0 ± 0         | 0 ± 0.004     | 0 ± 0.002     | 0 ± 0.001     |

Table 2. Detailed normal consistency (NC), easy non-manifold face (ENF) ratio and self-intersection (SI) ratio for reconstructed mesh quality evaluation of LV-endo, LV-epi and RV shape, respectively.

| Method  | CD (mm) ↓           |                     |                     |                     | EMD (mm) ↓          |                     |                     |                     | P2F (mm) ↓           |                     |                     |                     |
|---------|---------------------|---------------------|---------------------|---------------------|---------------------|---------------------|---------------------|---------------------|----------------------|---------------------|---------------------|---------------------|
|         | Endo                | Epi                 | RV                  | avg                 | Endo                | Epi                 | RV                  | avg                 | Endo                 | Epi                 | RV                  | avg                 |
| MR-Net  | 2.19 ± 0.754        | 2.82 ± 0.789        | 2.33 ± 0.737        | 2.44 ± 0.678        | 4.23 ± 1.09         | 5.37 ± 1.01         | 4.63 ± 1.11         | 4.74 ± 0.635        | 1.21 ± 0.560         | 1.44 ± 0.595        | 1.35 ± 0.627        | 1.33 ± 0.532        |
| NMF     | 3.39 ± 2.48         | 3.85 ± 1.36         | 4.02 ± 2.34         | 3.76 ± 1.84         | 4.18 ± 1.08         | 5.94 ± 1.25         | 4.63 ± 1.28         | 4.92 ± 0.909        | 2.19 ± 1.91          | 2.26 ± 1.07         | 2.90 ± 2.19         | 2.45 ± 1.54         |
| Ours-un | 1.99 ± 0.635        | 3.58 ± 0.682        | 3.51 ± 1.58         | 3.03 ± 0.739        | 3.75 ± 0.715        | 5.37 ± 0.803        | 4.12 ± 1.05         | 4.41 ± 0.545        | 1.21 ± 0.484         | 2.15 ± 0.486        | 2.37 ± 1.42         | 1.91 ± 0.603        |
| Ours    | <b>1.54 ± 0.535</b> | <b>2.36 ± 0.584</b> | <b>1.91 ± 0.714</b> | <b>1.94 ± 0.525</b> | <b>3.43 ± 0.653</b> | <b>5.18 ± 0.820</b> | <b>3.23 ± 0.872</b> | <b>3.95 ± 0.514</b> | <b>0.827 ± 0.389</b> | <b>1.15 ± 0.390</b> | <b>1.03 ± 0.621</b> | <b>1.00 ± 0.402</b> |

Table 3. Detailed Chamfer distance (CD), earth mover’s distance (EMD) and point-to-surface distance (P2F) for shape registration accuracy evaluation of LV-endo, LV-epi and RV, respectively. We register shapes from ED phase to ES phase.
